# Supplementary material for: Asiatic acid attenuates methamphetamine-induced neuroinflammation and neurotoxicity through blocking of NF-kB/STAT3/ERK and mitochondria-mediated apoptosis pathway
Source: Springer Nature journal article supplement (doi:10.1186/s12974-017-1009-0), 2017-12-01

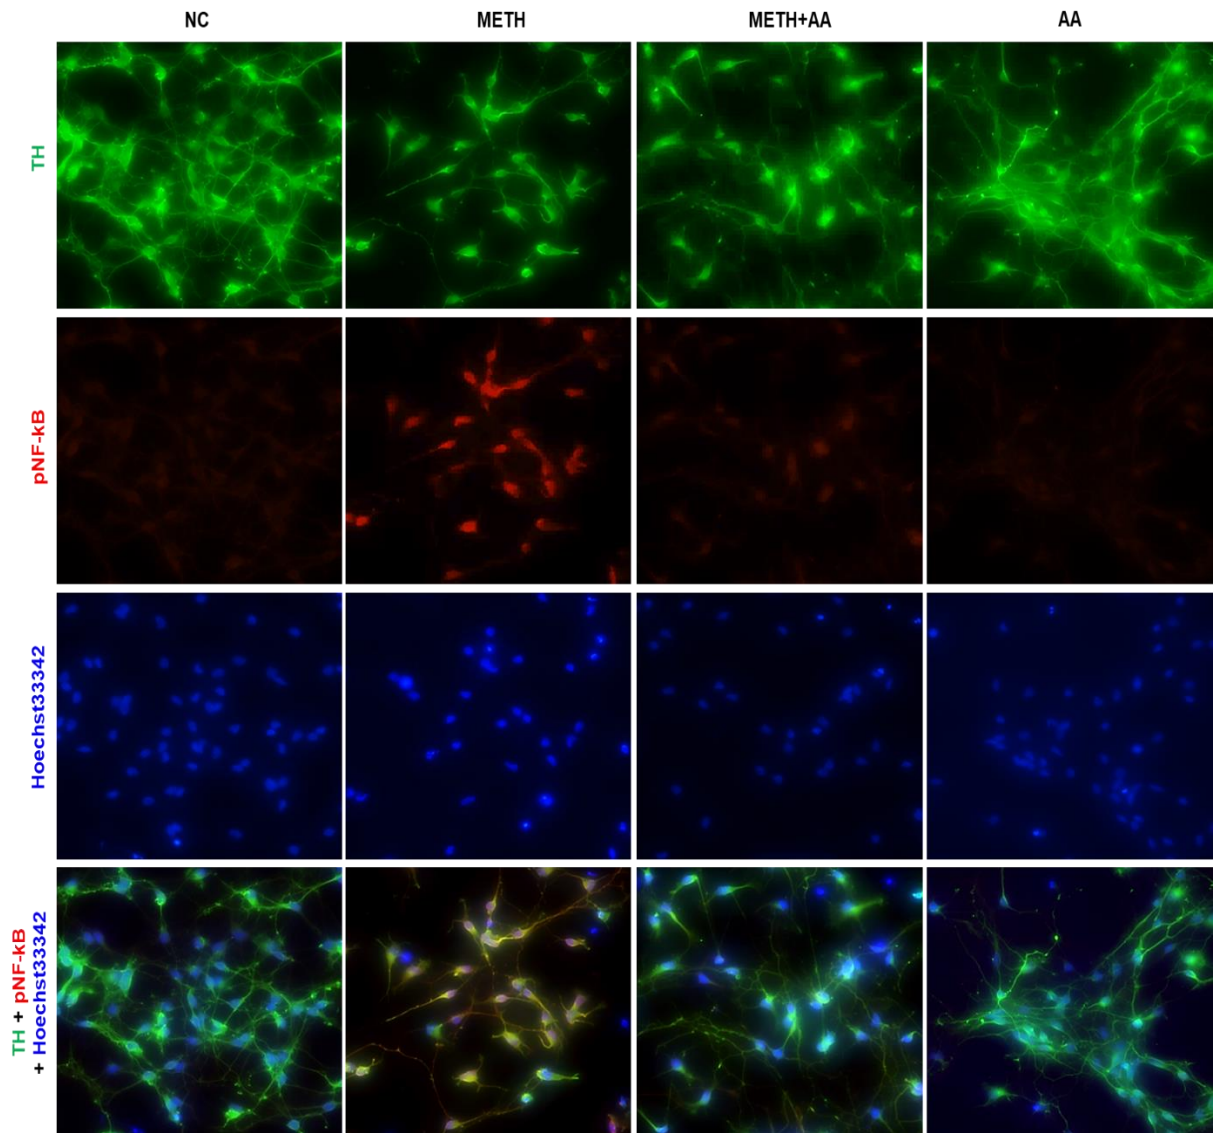

Supplement: MOESM3 [file 15296154]
